# Supplementary material
Source: publisher figshare collection journal article supplement (https://tandf.figshare.com/articles/dataset/_/5674423)
Supplement: Supplementary file 1 [file 1]

**Supplementary Table 2** Gradient of logarithmic equations in experimental group at different UV exposure weeks.

| UV exposure weeks                                                                                                                        | Gradient (Average $\pm$ SD) |
|------------------------------------------------------------------------------------------------------------------------------------------|-----------------------------|
| 0 week                                                                                                                                   | 0.01096 $\pm$ 0.000114018   |
| 2 weeks                                                                                                                                  | 0.01180 $\pm$ 0.000430116   |
| 4 weeks                                                                                                                                  | 0.01138 $\pm$ 0.000535724   |
| 6 weeks                                                                                                                                  | 0.01494 $\pm$ 0.000661816   |
| 8 weeks                                                                                                                                  | 0.01658 $\pm$ 0.000576194   |
| 10 weeks                                                                                                                                 | 0.01768 $\pm$ 0.000465833   |
| 12 weeks                                                                                                                                 | 0.01704 $\pm$ 0.000610737   |
| 14 weeks                                                                                                                                 | 0.01922 $\pm$ 0.001116692   |
| 16 weeks                                                                                                                                 | 0.02210 $\pm$ 0.000678233   |
| Tukey or Duncan tests significantly grouped the UV exposure weeks into five groups; 0 to 4, 6, 8 to 12, 14, and 16 weeks. ( $p < 0.05$ ) |                             |
