# Supplementary material
Source: publisher figshare collection journal article supplement (https://tandf.figshare.com/articles/dataset/_/5674423)
Supplement: Supplementary file 2 [file 1]

**Supplementary Table 1** Average temperature of region of interest in experimental group at different UV exposure weeks.

|        | 0 wk  | 2 wks | 4 wks | 6 wks | 8 wks  | 10 wks | 12 wks | 14 wks | 16 wks |
|--------|-------|-------|-------|-------|--------|--------|--------|--------|--------|
| 1 TF   | 40    | 40    | 40    | 40    | 40     | 40     | 40     | 40     | 40     |
| 2 TFs  | 39.8  | 39.8  | 39.8  | 39.8  | 39.725 | 39.74  | 39.54  | 39.51  | 39.55  |
| 3 TFs  | 39.5  | 39.55 | 39.55 | 39.45 | 39.35  | 39.14  | 39.04  | 39.14  | 38.95  |
| 4 TFs  | 39.35 | 39.4  | 39.5  | 39.35 | 39.125 | 38.88  | 38.73  | 38.95  | 38.82  |
| 5 TFs  | 39.25 | 39.25 | 39.4  | 39.25 | 39.025 | 38.81  | 38.87  | 38.78  | 38.485 |
| 6 TFs  | 39.2  | 39.15 | 39.25 | 39    | 38.9   | 38.82  | 38.86  | 38.74  | 38.485 |
| 7 TFs  | 39.2  | 39.1  | 39.15 | 38.85 | 38.8   | 38.81  | 38.75  | 38.47  | 38.485 |
| 8 TFs  | 39.2  | 39.05 | 39.05 | 38.8  | 38.725 | 38.78  | 38.52  | 38.53  | 38.45  |
| 9 TFs  | 39.15 | 39.05 | 38.95 | 38.6  | 38.625 | 38.71  | 38.45  | 38.58  | 38.41  |
| 10 TFs | 39.1  | 39    | 38.65 | 38.4  | 38.475 | 38.7   | 38.25  | 38.54  | 38.395 |
| 11 TFs | 39.1  | 38.8  | 38.4  | 38.35 | 38.3   | 38.63  | 38.35  | 38.47  | 38.375 |
| 12 TFs | 39    | 38.65 | 38.4  | 38.35 | 38.2   | 38.37  | 38.18  | 38.38  | 38.345 |
| 13 TFs | 38.9  | 38.6  | 38.4  | 38.3  | 38.125 | 38.1   | 38.3   | 38.29  | 38.305 |
| 14 TFs | 38.9  | 38.55 | 38.35 | 38.25 | 38.075 | 38.07  | 38.2   | 38.18  | 38.305 |
| 15 TFs | 38.85 | 38.55 | 38.3  | 38.25 | 38.075 | 37.86  | 38.28  | 38.08  | 38.22  |
| 16 TFs | 38.8  | 38.5  | 38.3  | 38.2  | 38.025 | 37.88  | 38.18  | 37.93  | 38.135 |
| 17 TFs | 38.75 | 38.4  | 38.3  | 38.15 | 37.975 | 37.91  | 38.19  | 38.03  | 38.05  |
| 18 TFs | 38.7  | 38.35 | 38.3  | 38.15 | 37.925 | 37.8   | 38.05  | 38     | 37.95  |
| 19 TFs | 38.65 | 38.3  | 38.25 | 38.1  | 37.875 | 37.79  | 38.03  | 37.86  | 37.815 |
| 20 TFs | 38.6  | 38.3  | 38.2  | 38.05 | 37.875 | 37.75  | 37.97  | 37.97  | 37.715 |
| 21 TFs | 38.6  | 38.25 | 38.2  | 38    | 37.75  | 37.64  | 37.87  | 37.84  | 37.655 |
| 22 TFs | 38.45 | 38.25 | 38.2  | 37.95 | 37.625 | 37.61  | 37.86  | 37.72  | 37.59  |
| 23 TFs | 38.3  | 38.2  | 38.15 | 37.95 | 37.625 | 37.54  | 37.86  | 37.68  | 37.515 |
| 24 TFs | 38.25 | 38.1  | 38.1  | 37.9  | 37.625 | 37.51  | 37.81  | 37.72  | 37.45  |
| 25 TFs | 38.2  | 38.1  | 38.1  | 37.85 | 37.625 | 37.55  | 37.65  | 37.66  | 37.445 |
| 26 TFs | 38.2  | 38.1  | 38.1  | 37.85 | 37.625 | 37.55  | 37.75  | 37.71  | 37.395 |
| 27 TFs | 38.2  | 38.1  | 38.1  | 37.8  | 37.6   | 37.46  | 37.71  | 37.69  | 37.305 |
| 28 TFs | 38.2  | 38.1  | 38.05 | 37.75 | 37.6   | 37.46  | 37.7   | 37.67  | 37.245 |
| 29 TFs | 38.2  | 38.15 | 37.85 | 37.7  | 37.575 | 37.51  | 37.68  | 37.28  | 37.225 |
| 30 TFs | 38.15 | 38.15 | 37.65 | 37.55 | 37.525 | 37.42  | 37.64  | 37.33  | 37.2   |
| 31 TFs | 38.1  | 38.15 | 37.55 | 37.45 | 37.5   | 37.34  | 37.65  | 37.33  | 37.145 |
| 32 TFs | 38.1  | 38.1  | 37.45 | 37.45 | 37.45  | 37.42  | 37.4   | 37.45  | 37.105 |
| 33 TFs | 38.1  | 38.1  | 37.45 | 37.45 | 37.4   | 37.4   | 37.4   | 37.4   | 37.105 |
| 34 TFs | 37.95 | 38.1  | 37.4  | 37.45 | 37.375 | 37.35  | 37.49  | 37.43  | 37.105 |
| 35 TFs | 37.8  | 38.1  | 37.4  | 37.45 | 37.325 | 37.39  | 37.51  | 37.2   | 37.085 |
| 36 TFs | 37.8  | 38.1  | 37.4  | 37.45 | 37.25  | 37.44  | 37.57  | 37.43  | 37.085 |
| 37 TFs | 37.8  | 38.05 | 37.4  | 37.45 | 37.175 | 37.37  | 37.45  | 37.39  | 37.065 |

|        |       |       |       |       |        |       |       |       |        |
|--------|-------|-------|-------|-------|--------|-------|-------|-------|--------|
| 38 TFs | 37.8  | 38    | 37.4  | 37.45 | 37.15  | 37.25 | 37.33 | 37.22 | 37.055 |
| 39 TFs | 37.75 | 37.9  | 37.4  | 37.45 | 37.1   | 37.28 | 37.22 | 37.36 | 37.05  |
| 40 TFs | 37.7  | 37.85 | 37.4  | 37.3  | 37.1   | 37.21 | 37.14 | 37.29 | 37.05  |
| 41 TFs | 37.7  | 37.8  | 37.35 | 37.05 | 37.05  | 37.08 | 37.28 | 37.25 | 37.04  |
| 42 TFs | 37.7  | 37.75 | 37.35 | 36.85 | 37.025 | 36.95 | 37.22 | 37.22 | 37.015 |
| 43 TFs | 37.7  | 37.75 | 37.4  | 36.65 | 37.025 | 37    | 37.24 | 37.14 | 37.01  |
| 44 TFs | 37.7  | 37.75 | 37.35 | 36.55 | 37     | 36.95 | 37.17 | 37.19 | 37.005 |
| 45 TFs | 37.7  | 37.75 | 37.25 | 36.55 | 36.95  | 37.01 | 37.03 | 37.08 | 36.965 |
| 46 TFs | 37.7  | 37.75 | 37.25 | 36.55 | 36.925 | 36.98 | 37.09 | 37.11 | 36.92  |
| 47 TFs | 37.7  | 37.7  | 37.2  | 36.55 | 36.925 | 36.95 | 37.14 | 37.23 | 36.905 |
| 48 TFs | 37.7  | 37.65 | 37.15 | 36.55 | 36.925 | 36.94 | 37    | 37.14 | 36.905 |
| 49 TFs | 37.65 | 37.65 | 37.05 | 36.55 | 36.925 | 37.02 | 36.96 | 36.99 | 36.905 |
| 50 TFs | 37.65 | 37.6  | 37.05 | 36.55 | 36.9   | 36.95 | 36.95 | 37.07 | 36.905 |
| 51 TFs | 37.6  | 37.5  | 37    | 36.5  | 36.875 | 36.92 | 37.04 | 37.06 | 36.9   |
| 52 TFs | 37.6  | 37.5  | 37    | 36.45 | 36.85  | 36.75 | 37.11 | 37.06 | 36.875 |
| 53 TFs | 37.6  | 37.45 | 37    | 36.45 | 36.85  | 36.75 | 36.87 | 37.02 | 36.885 |
| 54 TFs | 37.6  | 37.45 | 37    | 36.45 | 36.875 | 36.74 | 36.89 | 37.02 | 36.89  |
| 55 TFs | 37.6  | 37.4  | 37    | 36.45 | 36.875 | 36.65 | 36.89 | 37.05 | 36.89  |
| 56 TFs | 37.6  | 37.35 | 37    | 36.45 | 36.85  | 36.68 | 36.88 | 37.09 | 36.875 |
| 57 TFs | 37.6  | 37.3  | 37    | 36.45 | 36.85  | 36.62 | 36.69 | 36.9  | 36.86  |
| 58 TFs | 37.6  | 37.25 | 37    | 36.45 | 36.775 | 36.71 | 36.41 | 36.98 | 36.86  |
| 59 TFs | 37.6  | 37.25 | 37    | 36.45 | 36.75  | 36.71 | 36.58 | 36.9  | 36.85  |
| 60 TFs | 37.6  | 37.25 | 37    | 36.4  | 36.75  | 36.84 | 36.58 | 37    | 36.85  |

TF: time frame (approximately 0.3 seconds)
